# Supplementary material
Source: Springer Nature journal article supplement (https://www.springermedizin.de/resource/supplementary/13018_2007_63_MOESM5_ESM.pdf/9636242)

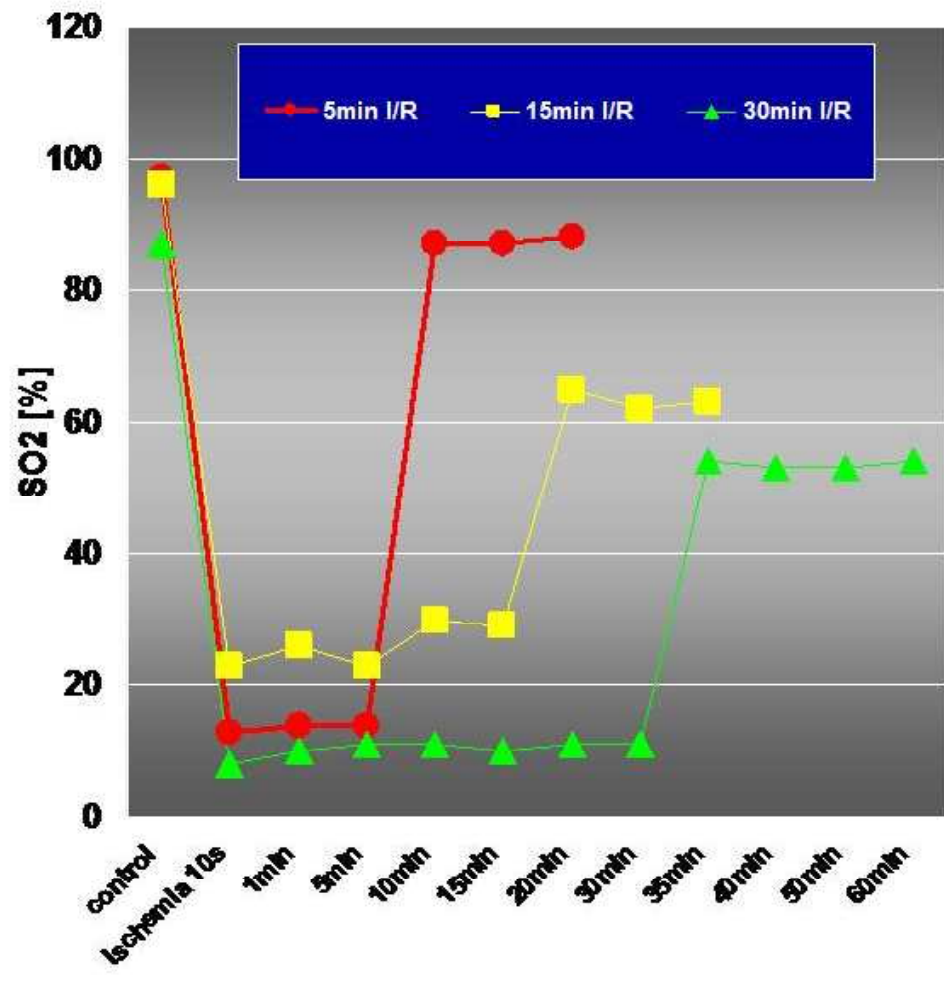

Supplement: MOESM5 [file 9636242]
